# Supplementary material for: Synthesis and separation of dyesvia Ni@reduced graphene oxide nanostructures
Source: Royal Society of Chemistry journal article supplement (doi:10.1039/c1jm13032c), 2011-12-05
Supplement: c1jm13032c.pdf [file c1jm13032c.pdf]

Electronic Supplementary Information (ESI) for

## Synthesis and Separation of Dyes via Ni@Reduced Graphene Oxide Nanostructures

Baojun Li,<sup>a</sup> Huaqiang Cao,<sup>\*a</sup> Jiefu Yin,<sup>a</sup> Yimin A. Wu,<sup>b</sup> and Jamie H. Warner<sup>b</sup>

<sup>a</sup> Department of Chemistry, Tsinghua University, Beijing 100084, P R China

<sup>b</sup> Department of Materials, University of Oxford, Parks Road, Oxford OX1 3PH, United Kingdom

\*Corresponding author. E-mail: hqcao@mail.tsinghua.edu.cn

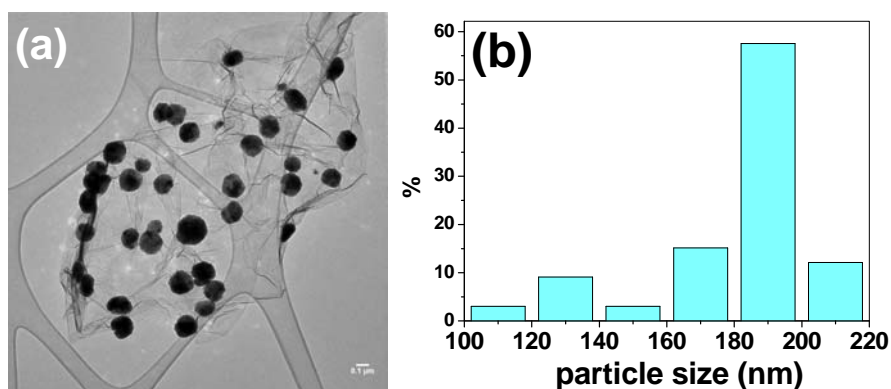

Figure S1. (a) TEM image and (b) corresponding histogram data of particles size and distribution.

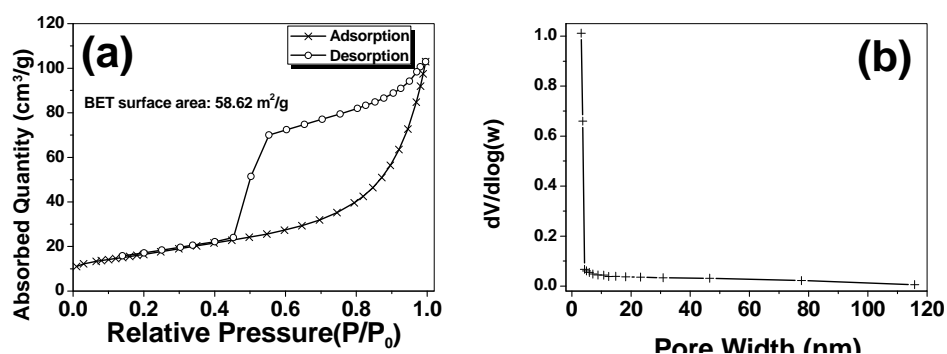

Figure S2. (a) Nitrogen adsorption and desorption isothermals for nitrogen measured at 77 K and (b) corresponding pore size distribution.
